# Supplementary material
Source: publisher figshare collection journal article supplement (https://acs.figshare.com/ndownloader/files/5689038)
Supplement: Supplementary file 1 [file 5689038]

# ic001006s.cif

data_dd391

_audit_creation_method            SHELXL-97
_chemical_name_systematic
;
 ?
;
_chemical_name_common             ?
_chemical_melting_point           ?
_chemical_formula_moiety          ?
_chemical_formula_sum
 'C16 H18 N2 Na O8 W'
_chemical_formula_weight          573.16

loop_
 _atom_type_symbol
 _atom_type_description
 _atom_type_scat_dispersion_real
 _atom_type_scat_dispersion_imag
 _atom_type_scat_source
 'C'  'C'   0.0033   0.0016
 'International Tables Vol C Tables 4.2.6.8 and 6.1.1.4'
 'H'  'H'   0.0000   0.0000
 'International Tables Vol C Tables 4.2.6.8 and 6.1.1.4'
 'N'  'N'   0.0061   0.0033
 'International Tables Vol C Tables 4.2.6.8 and 6.1.1.4'
 'O'  'O'   0.0106   0.0060
 'International Tables Vol C Tables 4.2.6.8 and 6.1.1.4'
 'W'  'W'  -0.8490   6.8722
 'International Tables Vol C Tables 4.2.6.8 and 6.1.1.4'
 'Na'  'Na'   0.0362   0.0249
 'International Tables Vol C Tables 4.2.6.8 and 6.1.1.4'

_symmetry_cell_setting            Triclinic
_symmetry_space_group_name_H-M    P-1

loop_
 _symmetry_equiv_pos_as_xyz
 'x, y, z'
 '-x, -y, -z'

_cell_length_a                    7.2771(5)
_cell_length_b                    10.9638(7)
_cell_length_c                    13.1279(8)
_cell_angle_alpha                 73.9650(10)
_cell_angle_beta                  86.4450(10)
_cell_angle_gamma                 79.7780(10)
_cell_volume                      990.58(11)
_cell_formula_units_Z             2
_cell_measurement_temperature     163(2)
_cell_measurement_reflns_used     ?
_cell_measurement_theta_min       ?
_cell_measurement_theta_max       ?

_exptl_crystal_description        ?
_exptl_crystal_colour             ?
_exptl_crystal_size_max           ?
_exptl_crystal_size_mid           ?
_exptl_crystal_size_min           ?
_exptl_crystal_density_meas       ?
_exptl_crystal_density_diffrn     1.922
_exptl_crystal_density_method     'not measured'
_exptl_crystal_F_000              554
_exptl_absorpt_coefficient_mu     5.898
_exptl_absorpt_correction_type    empirical
_exptl_absorpt_correction_T_min   0.5139
_exptl_absorpt_correction_T_max   0.9917
_exptl_absorpt_process_details    ?

_exptl_special_details
;
 ?
;

_diffrn_ambient_temperature       163(2)
_diffrn_radiation_wavelength      0.71073
_diffrn_radiation_type            MoK\a
_diffrn_radiation_source          'fine-focus sealed tube'
_diffrn_radiation_monochromator   graphite
_diffrn_measurement_device_type   'CCD area detector'
_diffrn_measurement_method        'phi and omega scans'
_diffrn_detector_area_resol_mean  ?
_diffrn_standards_number          ?
_diffrn_standards_interval_count  ?
_diffrn_standards_interval_time   ?
_diffrn_standards_decay_%         ?
_diffrn_reflns_number             11727
_diffrn_reflns_av_R_equivalents   0.0284
_diffrn_reflns_av_sigmaI/netI     0.0315
_diffrn_reflns_limit_h_min        -9
_diffrn_reflns_limit_h_max        9
_diffrn_reflns_limit_k_min        -14
_diffrn_reflns_limit_k_max        14
_diffrn_reflns_limit_l_min        -16
_diffrn_reflns_limit_l_max        16
_diffrn_reflns_theta_min          1.61
_diffrn_reflns_theta_max          27.50
_reflns_number_total              4498
_reflns_number_gt                 4130
_reflns_threshold_expression      >2sigma(I)

_computing_data_collection        'Bruker SMART'
_computing_cell_refinement        'Bruker SMART'
_computing_data_reduction         'Bruker SHELXTL'
_computing_structure_solution     'SHELXS-97 (Sheldrick, 1990)'
_computing_structure_refinement   'SHELXL-97 (Sheldrick, 1997)'
_computing_molecular_graphics     'Bruker SHELXTL'
_computing_publication_material   'Bruker SHELXTL'

_refine_special_details
;
 Refinement of F^2^ against ALL reflections.  The weighted R-factor wR and
 goodness of fit S are based on F^2^, conventional R-factors R are based
 on F, with F set to zero for negative F^2^. The threshold expression of
 F^2^ > 2sigma(F^2^) is used only for calculating R-factors(gt) etc. and is
 not relevant to the choice of reflections for refinement.  R-factors based
 on F^2^ are statistically about twice as large as those based on F, and R-
 factors based on ALL data will be even larger.
;

_refine_ls_structure_factor_coef  Fsqd
_refine_ls_matrix_type            full
_refine_ls_weighting_scheme       calc
_refine_ls_weighting_details
 'calc w=1/[\s^2^(Fo^2^)+(0.0201P)^2^+2.7400P] where P=(Fo^2^+2Fc^2^)/3'
_atom_sites_solution_primary      direct
_atom_sites_solution_secondary    difmap
_atom_sites_solution_hydrogens    geom
_refine_ls_hydrogen_treatment     mixed
_refine_ls_extinction_method      SHELXL
_refine_ls_extinction_coef        0.0016(3)
_refine_ls_extinction_expression
 'Fc^*^=kFc[1+0.001xFc^2^\l^3^/sin(2\q)]^-1/4^'
_refine_ls_number_reflns          4498
_refine_ls_number_parameters      254
_refine_ls_number_restraints      0
_refine_ls_R_factor_all           0.0260
_refine_ls_R_factor_gt            0.0213
_refine_ls_wR_factor_ref          0.0632
_refine_ls_wR_factor_gt           0.0524
_refine_ls_goodness_of_fit_ref    1.214
_refine_ls_restrained_S_all       1.214
_refine_ls_shift/su_max           0.009
_refine_ls_shift/su_mean          0.001

loop_
 _atom_site_label
 _atom_site_type_symbol
 _atom_site_fract_x
 _atom_site_fract_y
 _atom_site_fract_z
 _atom_site_U_iso_or_equiv
 _atom_site_adp_type
 _atom_site_occupancy
 _atom_site_symmetry_multiplicity
 _atom_site_calc_flag
 _atom_site_refinement_flags
 _atom_site_disorder_assembly
 _atom_site_disorder_group
W1 W 0.21667(2) 0.132337(15) 0.156425(13) 0.01564(7) Uani 1 1 d . . .
O1 O 0.2473(5) -0.1679(3) 0.2161(3) 0.0273(7) Uani 1 1 d . . .
O2 O 0.4161(5) 0.0762(3) 0.3786(2) 0.0291(7) Uani 1 1 d . . .
O3 O -0.2028(4) 0.1568(3) 0.2452(3) 0.0285(7) Uani 1 1 d . . .
O4 O 0.0604(5) 0.1340(3) -0.0652(3) 0.0284(7) Uani 1 1 d . . .
O5 O 0.6209(5) 0.0857(3) 0.0527(3) 0.0324(8) Uani 1 1 d . . .
N1 N 0.2123(5) 0.3503(3) 0.1060(3) 0.0176(7) Uani 1 1 d . . .
N2 N 0.1430(6) 0.3765(4) 0.2758(3) 0.0247(8) Uani 1 1 d . . .
H2A H 0.2162 0.2995 0.2998 0.030 Uiso 1 1 d R . .
H2B H 0.0241 0.3628 0.2794 0.030 Uiso 1 1 d R . .
C1 C 0.2325(6) -0.0569(4) 0.1938(3) 0.0208(9) Uani 1 1 d . . .
C2 C 0.3408(6) 0.1043(4) 0.2992(3) 0.0202(9) Uani 1 1 d . . .
C3 C -0.0511(6) 0.1514(4) 0.2149(3) 0.0183(8) Uani 1 1 d . . .
C4 C 0.1120(6) 0.1383(4) 0.0138(3) 0.0193(8) Uani 1 1 d . . .
C5 C 0.4764(6) 0.1072(4) 0.0912(3) 0.0212(9) Uani 1 1 d . . .
C6 C 0.1876(6) 0.4261(4) 0.1728(3) 0.0184(8) Uani 1 1 d . . .
C7 C 0.2109(6) 0.5572(4) 0.1381(4) 0.0203(9) Uani 1 1 d . . .
H7A H 0.1976 0.6081 0.1878 0.024 Uiso 1 1 d R . .
C8 C 0.2503(6) 0.6103(4) 0.0338(4) 0.0227(9) Uani 1 1 d . . .
H8A H 0.2664 0.6988 0.0096 0.027 Uiso 1 1 d R . .
C9 C 0.2685(6) 0.5348(4) -0.0375(4) 0.0239(9) Uani 1 1 d . . .
H9A H 0.2937 0.5703 -0.1114 0.029 Uiso 1 1 d R . .
C10 C 0.2491(6) 0.4084(4) 0.0013(3) 0.0196(8) Uani 1 1 d . . .
H10A H 0.2623 0.3564 -0.0476 0.024 Uiso 1 1 d R . .
Na1 Na 0.1777(5) 0.5291(3) 0.4129(3) 0.0711(8) Uani 1 1 d . . .
O1A O 0.3050(4) 0.3954(3) 0.6263(2) 0.0234(7) Uani 1 1 d . . .
O2A O 0.1974(4) 0.6758(3) 0.5821(2) 0.0234(6) Uani 1 1 d . . .
O3A O -0.0523(4) 0.7644(3) 0.4113(3) 0.0247(7) Uani 1 1 d . . .
C1A C 0.3574(7) 0.4752(5) 0.6858(4) 0.0261(10) Uani 1 1 d . . .
H1AA H 0.2633 0.4858 0.7387 0.031 Uiso 1 1 d R . .
H1AB H 0.4729 0.4347 0.7212 0.031 Uiso 1 1 d R . .
C2A C 0.3780(6) 0.6046(5) 0.6141(4) 0.0261(10) Uani 1 1 d . . .
H2AA H 0.4410 0.6502 0.6500 0.031 Uiso 1 1 d R . .
H2AB H 0.4511 0.5940 0.5528 0.031 Uiso 1 1 d R . .
C3A C 0.2085(6) 0.7892(4) 0.4994(4) 0.0242(9) Uani 1 1 d . . .
H3AA H 0.2854 0.7691 0.4422 0.029 Uiso 1 1 d R . .
H3AB H 0.2625 0.8485 0.5253 0.029 Uiso 1 1 d R . .
C4A C 0.0127(7) 0.8478(4) 0.4622(4) 0.0267(10) Uani 1 1 d . . .
H4AA H -0.0673 0.8589 0.5211 0.032 Uiso 1 1 d R . .
H4AB H 0.0126 0.9307 0.4126 0.032 Uiso 1 1 d R . .
C5A C -0.2358(7) 0.8116(5) 0.3710(5) 0.0345(12) Uani 1 1 d . . .
H5AA H -0.2441 0.8989 0.3283 0.041 Uiso 1 1 d R . .
H5AB H -0.3243 0.8097 0.4285 0.041 Uiso 1 1 d R . .
C6A C -0.2791(7) 0.7271(5) 0.3064(4) 0.0322(11) Uani 1 1 d . . .
H6AA H -0.1775 0.7158 0.2578 0.039 Uiso 1 1 d R . .
H6AB H -0.3897 0.7673 0.2660 0.039 Uiso 1 1 d R . .

loop_
 _atom_site_aniso_label
 _atom_site_aniso_U_11
 _atom_site_aniso_U_22
 _atom_site_aniso_U_33
 _atom_site_aniso_U_23
 _atom_site_aniso_U_13
 _atom_site_aniso_U_12
W1 0.01675(10) 0.01461(9) 0.01641(10) -0.00546(6) -0.00043(6) -0.00274(6)
O1 0.0310(18) 0.0180(15) 0.0321(18) -0.0040(13) -0.0097(14) -0.0031(13)
O2 0.0299(18) 0.0361(19) 0.0196(16) -0.0068(14) -0.0073(13) 0.0001(15)
O3 0.0198(17) 0.0353(19) 0.0311(18) -0.0106(15) 0.0048(14) -0.0055(14)
O4 0.0312(18) 0.0274(17) 0.0275(17) -0.0080(14) -0.0063(14) -0.0041(14)
O5 0.0265(18) 0.0308(18) 0.043(2) -0.0158(16) 0.0088(15) -0.0067(14)
N1 0.0180(17) 0.0180(17) 0.0174(17) -0.0062(14) 0.0016(13) -0.0025(14)
N2 0.027(2) 0.0236(19) 0.0243(19) -0.0058(16) 0.0006(15) -0.0070(16)
C1 0.023(2) 0.021(2) 0.017(2) -0.0030(17) -0.0013(16) -0.0024(17)
C2 0.019(2) 0.021(2) 0.023(2) -0.0121(17) 0.0058(17) -0.0037(17)
C3 0.031(2) 0.0137(18) 0.0112(18) -0.0051(15) -0.0033(16) -0.0021(17)
C4 0.020(2) 0.020(2) 0.018(2) -0.0068(17) 0.0007(16) -0.0019(16)
C5 0.027(2) 0.017(2) 0.021(2) -0.0057(17) -0.0015(18) -0.0066(17)
C6 0.0130(19) 0.021(2) 0.022(2) -0.0046(17) -0.0049(15) -0.0049(16)
C7 0.018(2) 0.018(2) 0.028(2) -0.0118(17) 0.0010(17) -0.0021(16)
C8 0.016(2) 0.017(2) 0.037(3) -0.0091(18) 0.0016(18) -0.0031(16)
C9 0.026(2) 0.020(2) 0.022(2) 0.0001(17) -0.0022(18) -0.0028(18)
C10 0.021(2) 0.020(2) 0.020(2) -0.0081(17) 0.0009(16) -0.0024(17)
Na1 0.071(2) 0.074(2) 0.071(2) -0.0254(16) -0.0028(16) -0.0099(16)
O1A 0.0252(16) 0.0240(16) 0.0216(16) -0.0061(13) -0.0021(13) -0.0055(13)
O2A 0.0199(15) 0.0254(16) 0.0255(16) -0.0071(13) 0.0025(12) -0.0064(13)
O3A 0.0209(16) 0.0207(15) 0.0341(18) -0.0108(13) -0.0020(13) -0.0021(12)
C1A 0.026(2) 0.035(3) 0.021(2) -0.0130(19) -0.0068(18) -0.005(2)
C2A 0.023(2) 0.033(2) 0.029(2) -0.019(2) -0.0026(18) -0.0060(19)
C3A 0.029(2) 0.024(2) 0.023(2) -0.0106(18) 0.0050(18) -0.0105(19)
C4A 0.028(2) 0.019(2) 0.032(2) -0.0024(19) 0.0003(19) -0.0067(18)
C5A 0.023(2) 0.022(2) 0.054(3) -0.002(2) -0.008(2) -0.0012(19)
C6A 0.028(3) 0.028(2) 0.034(3) 0.006(2) -0.012(2) -0.005(2)

_geom_special_details
;
 All esds (except the esd in the dihedral angle between two l.s. planes)
 are estimated using the full covariance matrix.  The cell esds are taken
 into account individually in the estimation of esds in distances, angles
 and torsion angles; correlations between esds in cell parameters are only
 used when they are defined by crystal symmetry.  An approximate (isotropic)
 treatment of cell esds is used for estimating esds involving l.s. planes.
;

loop_
 _geom_bond_atom_site_label_1
 _geom_bond_atom_site_label_2
 _geom_bond_distance
 _geom_bond_site_symmetry_2
 _geom_bond_publ_flag
W1 C1 1.980(4) . ?
W1 C5 2.032(5) . ?
W1 C4 2.045(4) . ?
W1 C3 2.047(5) . ?
W1 C2 2.053(4) . ?
W1 N1 2.292(3) . ?
O1 C1 1.157(5) . ?
O2 C2 1.147(5) . ?
O3 C3 1.147(5) . ?
O4 C4 1.141(5) . ?
O5 C5 1.153(6) . ?
N1 C6 1.349(5) . ?
N1 C10 1.377(5) . ?
N2 C6 1.354(6) . ?
N2 Na1 2.823(5) . ?
C6 C7 1.421(6) . ?
C7 C8 1.365(6) . ?
C8 C9 1.398(6) . ?
C9 C10 1.368(6) . ?
Na1 O3A 2.811(4) . ?
Na1 O1A 2.903(4) . ?
Na1 Na1 3.372(7) 2_566 ?
O1A C6A 1.426(5) 2_566 ?
O1A C1A 1.434(5) . ?
O2A C3A 1.418(5) . ?
O2A C2A 1.427(5) . ?
O3A C5A 1.422(5) . ?
O3A C4A 1.427(5) . ?
C1A C2A 1.497(7) . ?
C3A C4A 1.507(6) . ?
C5A C6A 1.499(7) . ?
C6A O1A 1.426(5) 2_566 ?

loop_
 _geom_angle_atom_site_label_1
 _geom_angle_atom_site_label_2
 _geom_angle_atom_site_label_3
 _geom_angle
 _geom_angle_site_symmetry_1
 _geom_angle_site_symmetry_3
 _geom_angle_publ_flag
C1 W1 C5 87.55(17) . . ?
C1 W1 C4 87.39(17) . . ?
C5 W1 C4 87.88(17) . . ?
C1 W1 C3 90.34(17) . . ?
C5 W1 C3 175.94(16) . . ?
C4 W1 C3 88.56(16) . . ?
C1 W1 C2 86.52(17) . . ?
C5 W1 C2 88.06(17) . . ?
C4 W1 C2 172.81(16) . . ?
C3 W1 C2 95.28(16) . . ?
C1 W1 N1 176.62(15) . . ?
C5 W1 N1 89.24(15) . . ?
C4 W1 N1 91.42(14) . . ?
C3 W1 N1 92.79(14) . . ?
C2 W1 N1 94.45(15) . . ?
C6 N1 C10 116.8(3) . . ?
C6 N1 W1 124.7(3) . . ?
C10 N1 W1 118.4(3) . . ?
C6 N2 Na1 115.8(3) . . ?
O1 C1 W1 178.0(4) . . ?
O2 C2 W1 173.1(4) . . ?
O3 C3 W1 176.2(4) . . ?
O4 C4 W1 175.6(4) . . ?
O5 C5 W1 175.4(4) . . ?
N1 C6 N2 119.8(4) . . ?
N1 C6 C7 121.5(4) . . ?
N2 C6 C7 118.7(4) . . ?
C8 C7 C6 119.7(4) . . ?
C7 C8 C9 119.6(4) . . ?
C10 C9 C8 117.9(4) . . ?
C9 C10 N1 124.4(4) . . ?
O3A Na1 N2 125.07(15) . . ?
O3A Na1 O1A 110.21(14) . . ?
N2 Na1 O1A 117.20(15) . . ?
O3A Na1 Na1 71.29(13) . 2_566 ?
N2 Na1 Na1 102.67(16) . 2_566 ?
O1A Na1 Na1 67.31(12) . 2_566 ?
C6A O1A C1A 111.3(4) 2_566 . ?
C6A O1A Na1 131.0(3) 2_566 . ?
C1A O1A Na1 115.3(3) . . ?
C3A O2A C2A 111.7(3) . . ?
C5A O3A C4A 113.0(4) . . ?
C5A O3A Na1 128.6(3) . . ?
C4A O3A Na1 118.3(3) . . ?
O1A C1A C2A 110.3(4) . . ?
O2A C2A C1A 109.2(4) . . ?
O2A C3A C4A 107.5(4) . . ?
O3A C4A C3A 108.1(4) . . ?
O3A C5A C6A 108.5(4) . . ?
O1A C6A C5A 110.3(4) 2_566 . ?

_diffrn_measured_fraction_theta_max    0.987
_diffrn_reflns_theta_full              27.50
_diffrn_measured_fraction_theta_full   0.987
_refine_diff_density_max    0.906
_refine_diff_density_min   -1.309
_refine_diff_density_rms    0.164

#===END
